# Supplementary material
Source: PubMed Central journal article supplement (PMC9647559)

## Supplemental Online Content

Blood AJ, Cannon CP, Gordon WJ, et al. Results of a remotely delivered hypertension and lipid program in more than 10 000 patients across a diverse health care network. *JAMA Cardiol*. Published online November 9, 2022. doi:10.1001/jamacardio.2022.4018

### **eMethods**

**eTable 1.** Patient Demographics in the Hypertension and Cholesterol Programs

**eTable 2.** Number of activities for patients to reach Maintenance

**eTable 3.** Rates of contact and enrollment stratified by Demographics of interest

**eTable 4.** Demographics of Educated-only and Medication management cohorts

**eFigure 1.** Hypertension Flow diagram: Broad overview (CCB – calcium-channel blocker, ARB – angiotensin receptor blocker, BB – beta-blocker)

**eFigure 2.** Statin Management Overview

**eFigure 3.** Patient Disposition in the combined Hypertension and Lipids Programs

**eFigure 4.** Changes in Medications During Management in patients who reach maintenance

This supplemental material has been provided by the authors to give readers additional information about their work.

## **eMethods**

### ***Patient Navigators***

Patient Navigators are trained to obtain patient medical history, lab data, and blood pressure readings to help facilitate clinical treatment based on recommendations from providers. Patient Navigators use their motivational interviewing skills to enroll the patient in the hypertension and lipid management programs and help patients with blood pressure device setup and the proper technique on how to take an accurate blood pressure reading. Patient Navigators follow standard operating procedures and receive training by Cardiologists, Pharmacists, and team leads. Communication occurred through secure portal messages, telephone calls, or after consent is obtained, email or text messaging. In close conjunction with cardiologists, physician leads, pharmacists and program managers leading this effort, this individual plays an instrumental role implementing team objectives, developing materials, screening and evaluating at-risk patients, and enrolling and facilitating patient progress through the program.

**eTable 1. Patient Demographics in the Hypertension and Cholesterol Programs**

| <b>Hypertension Program</b> |                                         |       |                               |       |                                                                |       |                                           |       |
|-----------------------------|-----------------------------------------|-------|-------------------------------|-------|----------------------------------------------------------------|-------|-------------------------------------------|-------|
|                             | <b>All Enrolled Patients<br/>n=3671</b> |       | <b>Still Active<br/>n=457</b> |       | <b>Exited Prematurely or<br/>Became Unreachable<br/>n=1697</b> |       | <b>Entered<br/>Maintenance<br/>n=1517</b> |       |
| <b>Age</b>                  |                                         |       |                               |       |                                                                |       |                                           |       |
| <65                         | 2188                                    | 59.6% | 387                           | 84.7% | 986                                                            | 58.1% | 763                                       | 50.3% |
| >65                         | 1483                                    | 40.4% | 70                            | 15.3% | 711                                                            | 41.9% | 754                                       | 49.7% |
| <b>Sex</b>                  |                                         |       |                               |       |                                                                |       |                                           |       |
| Male                        | 1548                                    | 42.2% | 207                           | 45.3% | 721                                                            | 42.5% | 620                                       | 40.9% |
| Female                      | 2115                                    | 57.6% | 249                           | 54.5% | 970                                                            | 57.2% | 896                                       | 59.1% |
| Unknown                     | 8                                       | 0.2%  | 1                             | 0.2%  | 6                                                              | 0.4%  | 1                                         | 0.1%  |
| <b>Ethnicity</b>            |                                         |       |                               |       |                                                                |       |                                           |       |
| Hispanic                    | 575                                     | 15.7% | 40                            | 8.8%  | 334                                                            | 19.7% | 201                                       | 13.2% |
| Non-Hispanic                | 2798                                    | 76.2% | 378                           | 82.7% | 1236                                                           | 72.8% | 1184                                      | 78.0% |
| Unknown                     | 298                                     | 8.1%  | 39                            | 8.5%  | 127                                                            | 7.5%  | 132                                       | 8.7%  |
| <b>Race</b>                 |                                         |       |                               |       |                                                                |       |                                           |       |
| White                       | 2211                                    | 60.2% | 331                           | 72.4% | 874                                                            | 51.5% | 1006                                      | 66.3% |
| Black                       | 718                                     | 19.6% | 58                            | 12.7% | 431                                                            | 25.4% | 229                                       | 15.1% |
| Other                       | 742                                     | 20.2% | 68                            | 14.9% | 392                                                            | 23.1% | 282                                       | 18.6% |
| <b>Language</b>             |                                         |       |                               |       |                                                                |       |                                           |       |
| English                     | 3260                                    | 88.8% | 425                           | 93.0% | 1469                                                           | 86.6% | 1366                                      | 90.0% |
| Non-English                 | 396                                     | 10.8% | 31                            | 6.8%  | 220                                                            | 13.0% | 145                                       | 9.6%  |
| Unknown                     | 15                                      | 0.4%  | 1                             | 0.2%  | 8                                                              | 0.5%  | 6                                         | 0.4%  |

| Lipid Program                   |                                 |       |                        |       |                                                          |       |                                  |       |
|---------------------------------|---------------------------------|-------|------------------------|-------|----------------------------------------------------------|-------|----------------------------------|-------|
|                                 | All Enrolled Patients<br>n=8103 |       | Still Active<br>n=1464 |       | Exited Prematurely<br>or Became<br>Unreachable<br>n=3859 |       | Entered<br>Maintenance<br>n=2780 |       |
| <b>Age</b>                      |                                 |       |                        |       |                                                          |       |                                  |       |
| <65                             | 4447                            | 54.9% | 1355                   | 92.6% | 2153                                                     | 55.8% | 1402                             | 50.4% |
| >65                             | 3656                            | 45.1% | 109                    | 7.4%  | 1706                                                     | 44.2% | 1378                             | 49.6% |
| <b>Sex</b>                      |                                 |       |                        |       |                                                          |       |                                  |       |
| Male                            | 3671                            | 45.3% | 652                    | 44.5% | 1714                                                     | 44.4% | 1305                             | 46.3% |
| Female                          | 4422                            | 54.6% | 809                    | 55.3% | 2139                                                     | 54.4% | 1474                             | 52.5% |
| Unknown                         | 10                              | 0.1%  | 3                      | 0.2%  | 6                                                        | 0.2%  | 1                                | 1.2%  |
| <b>Ethnicity</b>                |                                 |       |                        |       |                                                          |       |                                  |       |
| Hispanic                        | 703                             | 8.7%  | 89                     | 6.1%  | 319                                                      | 8.3%  | 295                              | 10.6% |
| Non-Hispanic                    | 6689                            | 82.5% | 1248                   | 85.2% | 3182                                                     | 82.5% | 2259                             | 81.3% |
| Unknown                         | 711                             | 8.8%  | 127                    | 8.7%  | 358                                                      | 9.3%  | 226                              | 8.1%  |
| <b>Race</b>                     |                                 |       |                        |       |                                                          |       |                                  |       |
| White                           | 6214                            | 76.7% | 1166                   | 79.6% | 2976                                                     | 77.1% | 2072                             | 74.5% |
| Black                           | 765                             | 9.4%  | 111                    | 7.6%  | 356                                                      | 9.2%  | 298                              | 10.7% |
| Other                           | 1124                            | 13.9% | 187                    | 12.8% | 527                                                      | 13.7% | 410                              | 14.7% |
| <b>Language</b>                 |                                 |       |                        |       |                                                          |       |                                  |       |
| English                         | 7518                            | 92.8% | 1381                   | 94.3% | 3599                                                     | 93.3% | 2538                             | 91.3% |
| Non-English                     | 508                             | 6.3%  | 70                     | 4.8%  | 218                                                      | 5.6%  | 220                              | 7.9%  |
| Unknown                         | 77                              | 1.0%  | 13                     | 0.9%  | 42                                                       | 1.1%  | 22                               | 0.8%  |
| <b>Indication for Treatment</b> |                                 |       |                        |       |                                                          |       |                                  |       |
| ASCVD                           | 2798                            | 34.5% | 507                    | 34.6% | 1258                                                     | 32.6% | 1033                             | 37.2% |
| Diabetes                        | 2198                            | 27.1% | 425                    | 29.0% | 982                                                      | 25.4% | 791                              | 28.5% |
| LDL>190                         | 2533                            | 31.3% | 474                    | 32.4% | 1339                                                     | 34.7% | 720                              | 25.9% |
| Primary Prevention              | 574                             | 7.2%  | 58                     | 4.0%  | 280                                                      | 7.3%  | 236                              | 8.5%  |

**eTable 2. Number of activities for patients to reach Maintenance**

| <b>Hypertension</b>      |            |
|--------------------------|------------|
| Total Activities*        | 19.3 (2.7) |
| Call Activities**        | 13.1 (2.9) |
| Post-Enrollment Calls*** | 11.0 (3.1) |

| <b>Lipids</b>            |            |
|--------------------------|------------|
| Total Activities*        | 33.8 (3.3) |
| Call Activities**        | 19.8 (4.2) |
| Post-Enrollment Calls*** | 18.0 (3.9) |

\*Total activities include all calls, as well as internal navigator activities like collecting/averaging BP readings, screening and checking labs/reviewing with pharmacists.

\*\*Call activities only include navigator-patient interactions, i.e. device set up/reminder calls, lab reminder calls, enrollment calls, and program/trial review calls.

\*\*\*Post-enrollment calls filters call activities to only include navigator-patient interactions after the patient's enrollment.

**eTable 3.** Rates of contact and enrollment stratified by Demographics of interest

|                  | Contacted | Enrolled | Did not finish program |            |              |             | Total Exited | Maintenance  | p-value |
|------------------|-----------|----------|------------------------|------------|--------------|-------------|--------------|--------------|---------|
|                  |           |          | Active                 | MD exit    | Unreachable  | Dropped out |              |              |         |
| <b>Race</b>      |           |          |                        |            |              |             |              |              |         |
| White            | 13189     | 7892     | 277<br>(3.5%)          | 501 (6.3%) | 2241 (28.4%) | 692 (8.8%)  | 3434 (43.5%) | 2944 (37.3%) | 0.88    |
| Black            | 2295      | 1360     | 59<br>(4.3%)           | 120 (8.8%) | 503 (37.0%)  | 102 (7.5%)  | 725 (53.3%)  | 499 (36.7%)  | 0.57    |
| Other            | 2960      | 1551     | 61<br>(3.9%)           | 129 (8.3%) | 632 (40.7%)  | 110 (7.1%)  | 871 (56.2%)  | 667 (43.0%)  | 0.75    |
| <b>Language</b>  |           |          |                        |            |              |             |              |              |         |
| Non-English      | 1642      | 861      | 34<br>(3.9%)           | 70 (8.1%)  | 284 (33.0%)  | 49 (5.7%)   | 403 (46.8%)  | 358 (41.6%)  | 0.68    |
| English          | 16802     | 9942     | 363<br>(3.7%)          | 680 (6.8%) | 3092 (31.1%) | 855 (8.6%)  | 4627 (46.5%) | 3752 (37.7%) |         |
| <b>Ethnicity</b> |           |          |                        |            |              |             |              |              |         |
| Hispanic         | 2153      | 1204     | 43<br>(3.6%)           | 94 (7.8%)  | 459 (38.1%)  | 70 (5.8%)   | 623 (51.7%)  | 480 (39.9%)  | 0.98    |
| Non-Hispanic     | 16291     | 9599     | 354<br>(3.7%)          | 656 (6.8%) | 2917 (30.4%) | 834 (8.7%)  | 4407 (45.9%) | 3630 (37.8%) |         |
| <b>Sex</b>       |           |          |                        |            |              |             |              |              |         |
| Men              | 8320      | 4695     | 172<br>(3.7%)          | 311 (6.6%) | 1498 (31.9%) | 285 (6.1%)  | 2094 (44.6%) | 1839 (39.2%) | 0.65    |
| Women            | 10124     | 6108     | 225<br>(3.7%)          | 439 (7.2%) | 1878 (30.7%) | 619 (10.1%) | 2936 (48.1%) | 2271 (37.2%) |         |
| Total            | 18444     | 10803    | 397<br>(3.7%)          | 750 (6.9%) | 3376 (31.3%) | 904 (8.4%)  | 5030 (46.6%) | 4110 (38.0%) |         |

**eTable 4.** Demographics of Educated-only and Medication management cohorts

| <b>Hypertension Cohort</b> |                              |                       |                |
|----------------------------|------------------------------|-----------------------|----------------|
|                            | <b>Medication Management</b> | <b>Education Only</b> |                |
|                            | <b>3370</b>                  | <b>301</b>            |                |
|                            | <b>n (%)</b>                 | <b>n (%)</b>          | <b>p-value</b> |
| <b>Age</b>                 |                              |                       |                |
| <65                        | 1887 (56.0%)                 | 301 (100.0%)          | <0.0001        |
| >65                        | 1483 (44.0%)                 | 0 (0.0%)              | <0.0001        |
| <b>Sex</b>                 |                              |                       |                |
| Male                       | 1409 (41.8%)                 | 139 (46.2%)           | 0.13           |
| Female                     | 1953 (58.0%)                 | 162 (53.8%)           | 0.16           |
| Unknown                    | 8 (0.02%)                    | 0 (0.0%)              | 0.99           |
| <b>Ethnicity</b>           |                              |                       |                |
| Hispanic                   | 554 (16.4%)                  | 21 (7.0%)             | <0.0001        |
| Non-Hispanic               | 2542 (75.4%)                 | 256 (85.0%)           | <0.0001        |
| Unknown                    | 274 (8.1%)                   | 24 (8.0%)             |                |
| <b>Race</b>                |                              |                       |                |
| White                      | 1976 (58.6%)                 | 235 (78.1%)           | <0.0001        |
| Black                      | 695 (20.6%)                  | 23 (7.6%)             | <0.0001        |
| Other                      | 699 (20.7%)                  | 43 (14.3%)            |                |
| <b>Language</b>            |                              |                       |                |
| English                    | 2974 (88.2%)                 | 286 (95.0%)           | <0.0001        |
| Non-English                | 381 (11.3%)                  | 15 (5.0%)             | 0.0002         |
| Unknown                    | 15 (0.4%)                    | 0 (0.4%)              | 0.65           |

| Lipid Cohort                    |                       |                |         |
|---------------------------------|-----------------------|----------------|---------|
|                                 | Medication Management | Education Only |         |
|                                 | 7138                  | 965            |         |
|                                 | n (%)                 | n (%)          | p-value |
| <b>Age</b>                      |                       |                |         |
| ≤65                             | 3482 (48.8%)          | 965 (100%)     | <0.0001 |
| >65                             | 3656 (51.2%)          | 0 (0%)         | <0.0001 |
| <b>Sex</b>                      |                       |                |         |
| Male                            | 3242 (45.4%)          | 429 (44.5%)    | 0.56    |
| Female                          | 3886 (54.4%)          | 536 (55.5%)    | 0.5     |
| Unknown                         | 10 (0.1%)             | 0 (0.0%)       | 0.65    |
| <b>Ethnicity</b>                |                       |                |         |
| Hispanic                        | 656 (9.2%)            | 47 (4.9%)      | <0.0001 |
| Non-Hispanic                    | 5863 (82.1%)          | 826 (85.6%)    | 0.005   |
| Unknown                         | 619 (8.7%)            | 92 (9.5%)      | 0.33    |
| <b>Race</b>                     |                       |                |         |
| White                           | 5427 (76.0%)          | 787 (81.6%)    | <0.0001 |
| Black                           | 703 (9.8%)            | 62 (6.4%)      | 0.0002  |
| Other                           | 1008 (14.1%)          | 116 (12.0%)    | 0.06    |
| <b>Language</b>                 |                       |                |         |
| English                         | 6602 (92.5%)          | 916 (94.9%)    | 0.003   |
| Non-English                     | 468 (6.6%)            | 40 (4.1%)      | 0.002   |
| Unknown                         | 68 (1.0%)             | 9 (0.9%)       | 0.99    |
| <b>Indication for Treatment</b> |                       |                |         |
| ASCVD                           | 2507 (35.1%)          | 291 (30.2%)    | 0.001   |
| Diabetes                        | 1906 (26.7%)          | 292 (30.3%)    | 0.01    |
| LDL>190 mg/dL                   | 2237 (31.3%)          | 296 (30.7%)    | 0.68    |
| Primary Prevention              | 488 (6.8%)            | 86 (8.9%)      | 0.01    |



**Additional Team contributors:**

|                                                                                                                                                                                                                                                       |                                                                                                                                                                                                                             |                                                                                                                                                                                                                              |                                                                                                                                                                                                                                                          |
|-------------------------------------------------------------------------------------------------------------------------------------------------------------------------------------------------------------------------------------------------------|-----------------------------------------------------------------------------------------------------------------------------------------------------------------------------------------------------------------------------|------------------------------------------------------------------------------------------------------------------------------------------------------------------------------------------------------------------------------|----------------------------------------------------------------------------------------------------------------------------------------------------------------------------------------------------------------------------------------------------------|
| Chulyadyo, Rupendra<br>Clark, Eugene H.<br>Dela Paz, Rory<br>Hartwell, William A.<br>Mailly, Carly J<br>Ohol, Vikas J.<br>Segal, John A.<br>Shin, Jiyeon<br>Ivonne King<br>Polovna Laine<br>Emma Clark<br>Ngoc Tran<br>Nina Pappacostas<br>Roy, Kayla | Ainsworth, Layne<br>Glynn, Corey<br>Green, Remlee<br>Lawhead, John<br>Liberatore, Paul<br>Gina Dube<br>Leo Buckley<br>Katelyn Sylvester<br>Emily Thibeault<br>Mike Kraft<br>Nicholas Chin<br>Elissa Savino<br>Eleanor Lasch | Landon Pike<br>Asma Adan<br>Tabitha Rutkowski<br>Curtis Sgroi<br>Christian Figueroa<br>Amber Haider<br>Evelyn Rivera<br>Noheli Romero<br>Michela Tucci<br>Karen Choe<br>Guinevere Feldman<br>Jordan Nossek<br>Taylor MacLean | St. Laurent, John Joseph<br>Varugheese, Matthew<br>Venman, Thomas<br>Wang, Fei<br>Whitworth, Robin M.<br>Williams, Michael Allyn<br>Mark Benson, MD<br>Matt Alexander<br>Jennifer White<br>Kira Chaney<br>Jonette Glass<br>Donna McCarthy<br>Shelby Gale |
|-------------------------------------------------------------------------------------------------------------------------------------------------------------------------------------------------------------------------------------------------------|-----------------------------------------------------------------------------------------------------------------------------------------------------------------------------------------------------------------------------|------------------------------------------------------------------------------------------------------------------------------------------------------------------------------------------------------------------------------|----------------------------------------------------------------------------------------------------------------------------------------------------------------------------------------------------------------------------------------------------------|

**eFigure 1.** Hypertension Flow diagram: Broad overview (*CCB – calcium-channel blocker, ARB – angiotensin receptor blocker, BB – beta-blocker*)

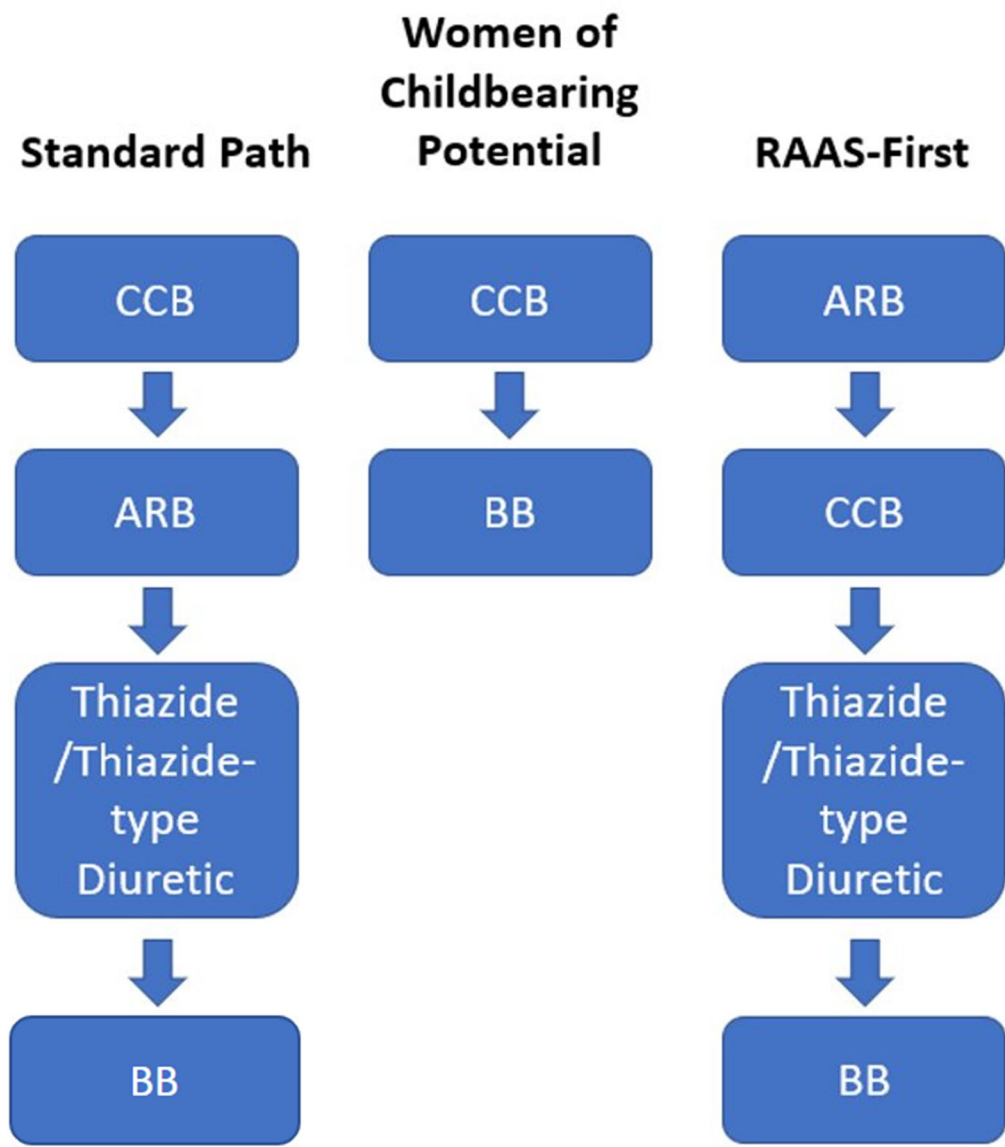

eFigure 2. Statin Management Overview

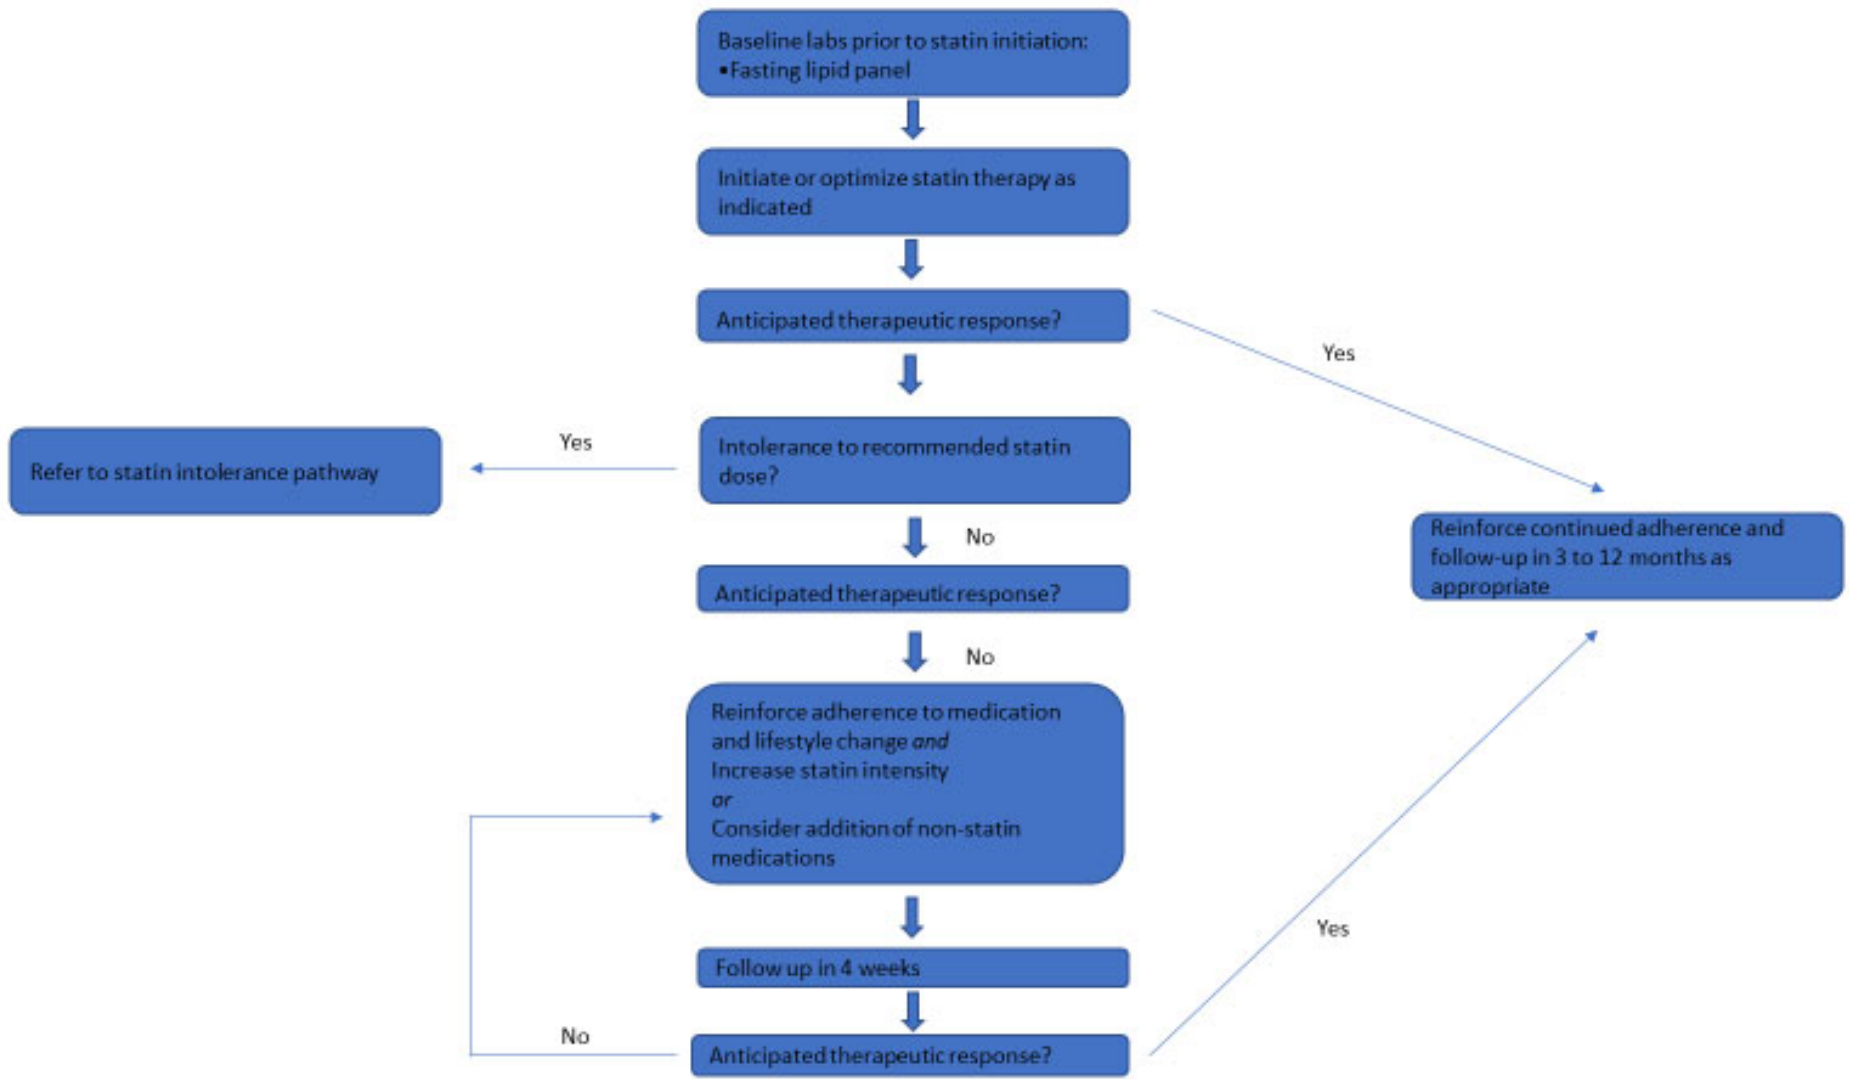

**eFigure 3.** Patient Disposition in the combined Hypertension and Lipids Programs

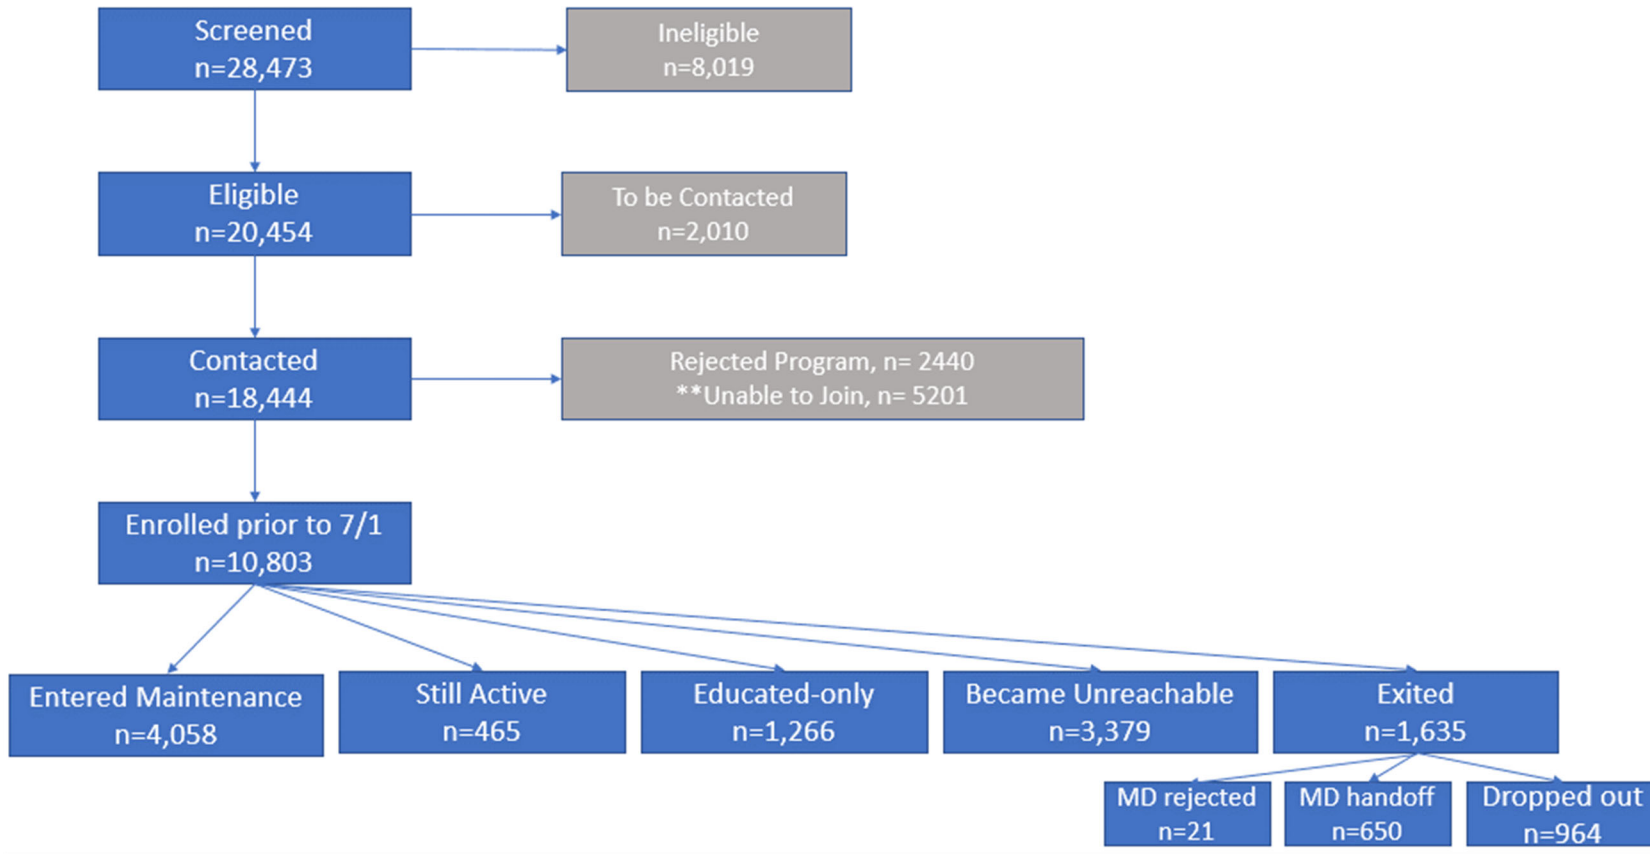

\*Patients to be contacted included patients who were screened in, PCPs contacted, however no outreach attempt had yet been made to the patient

\*\*Unable to join included patients who did not qualify for the program after interview, were moving out of state, pregnant or planning to become pregnant, did not manage their own medications, or were terminally ill

\*\*\*Education-only patients received dietary and lifestyle counseling and resources to assist in BP and/or LDL-c lowering however declined to participate in program medication management

**eFigure 4.** Changes in Medications During Management in patients who reach maintenance  
Panel A: Hypertension Sankey diagram (column and line thickness represent degree of change)

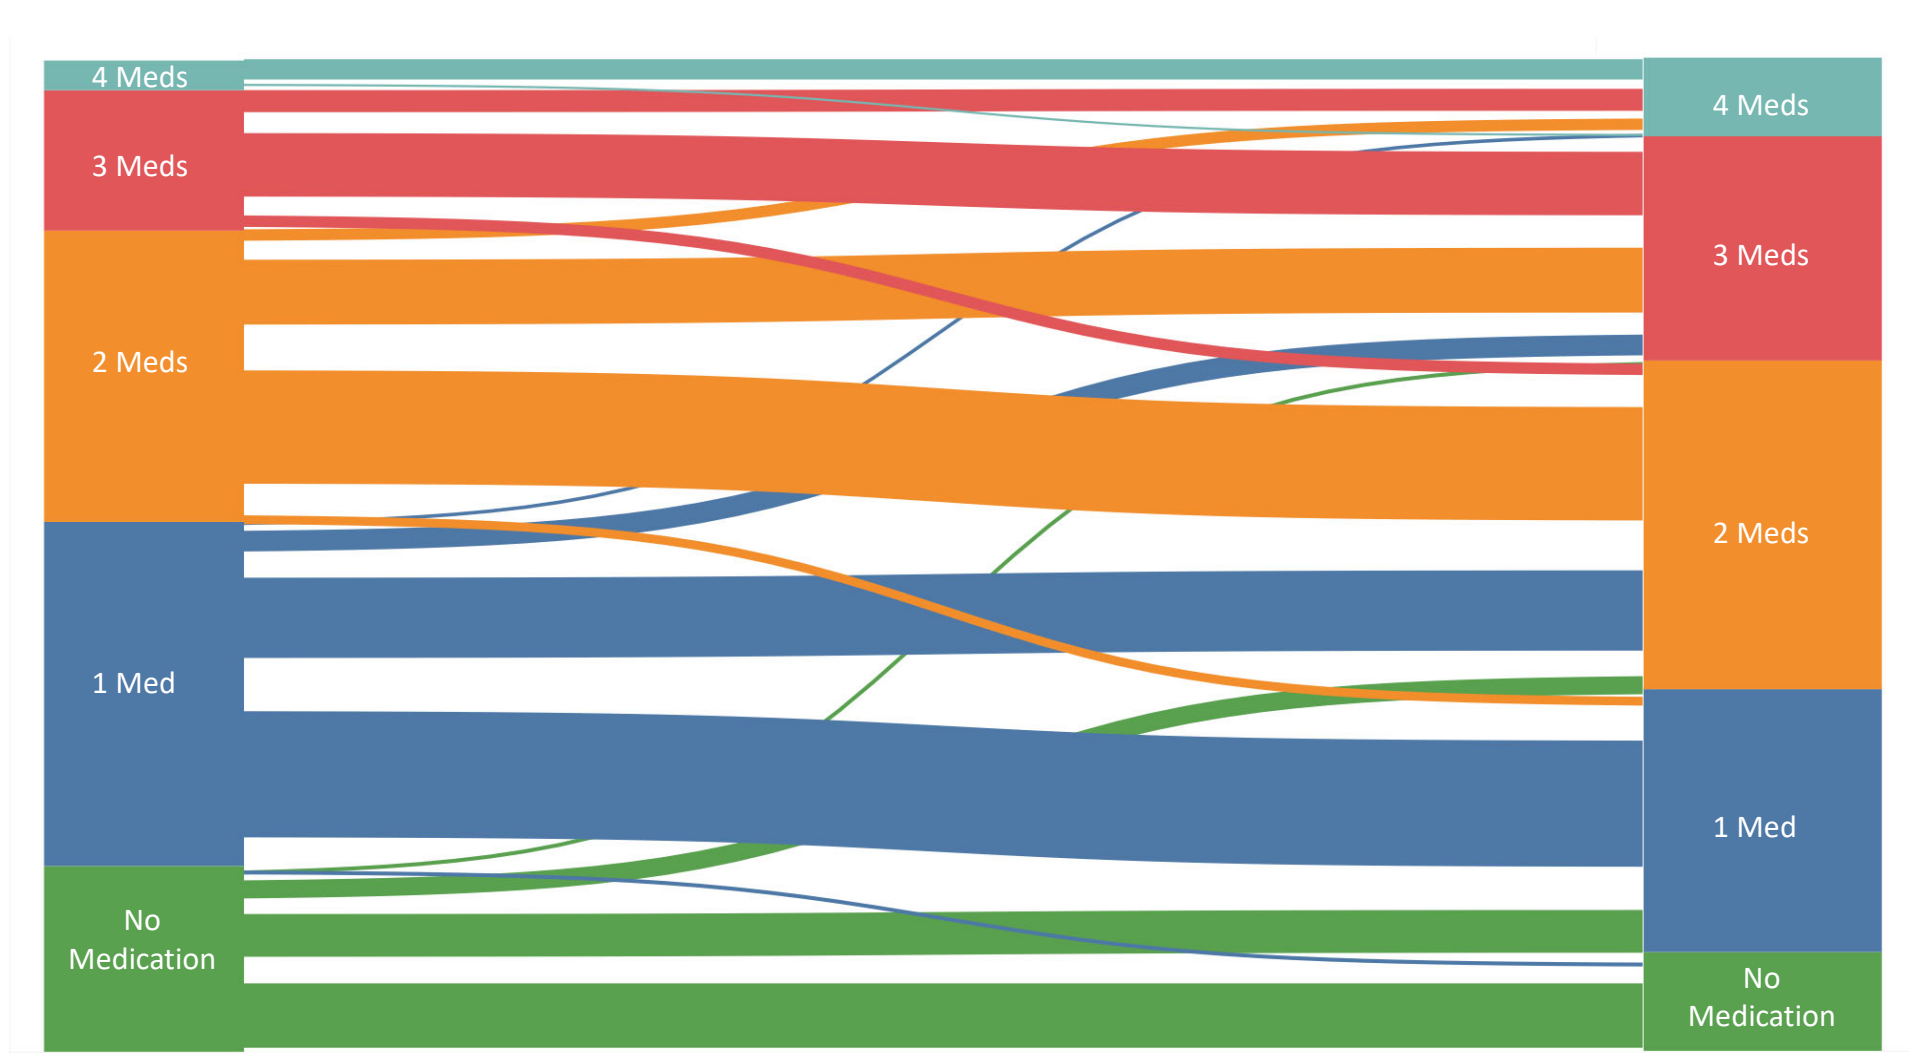

Panel B: Cholesterol (n) Sankey diagram (column and line thickness represent degree of change)

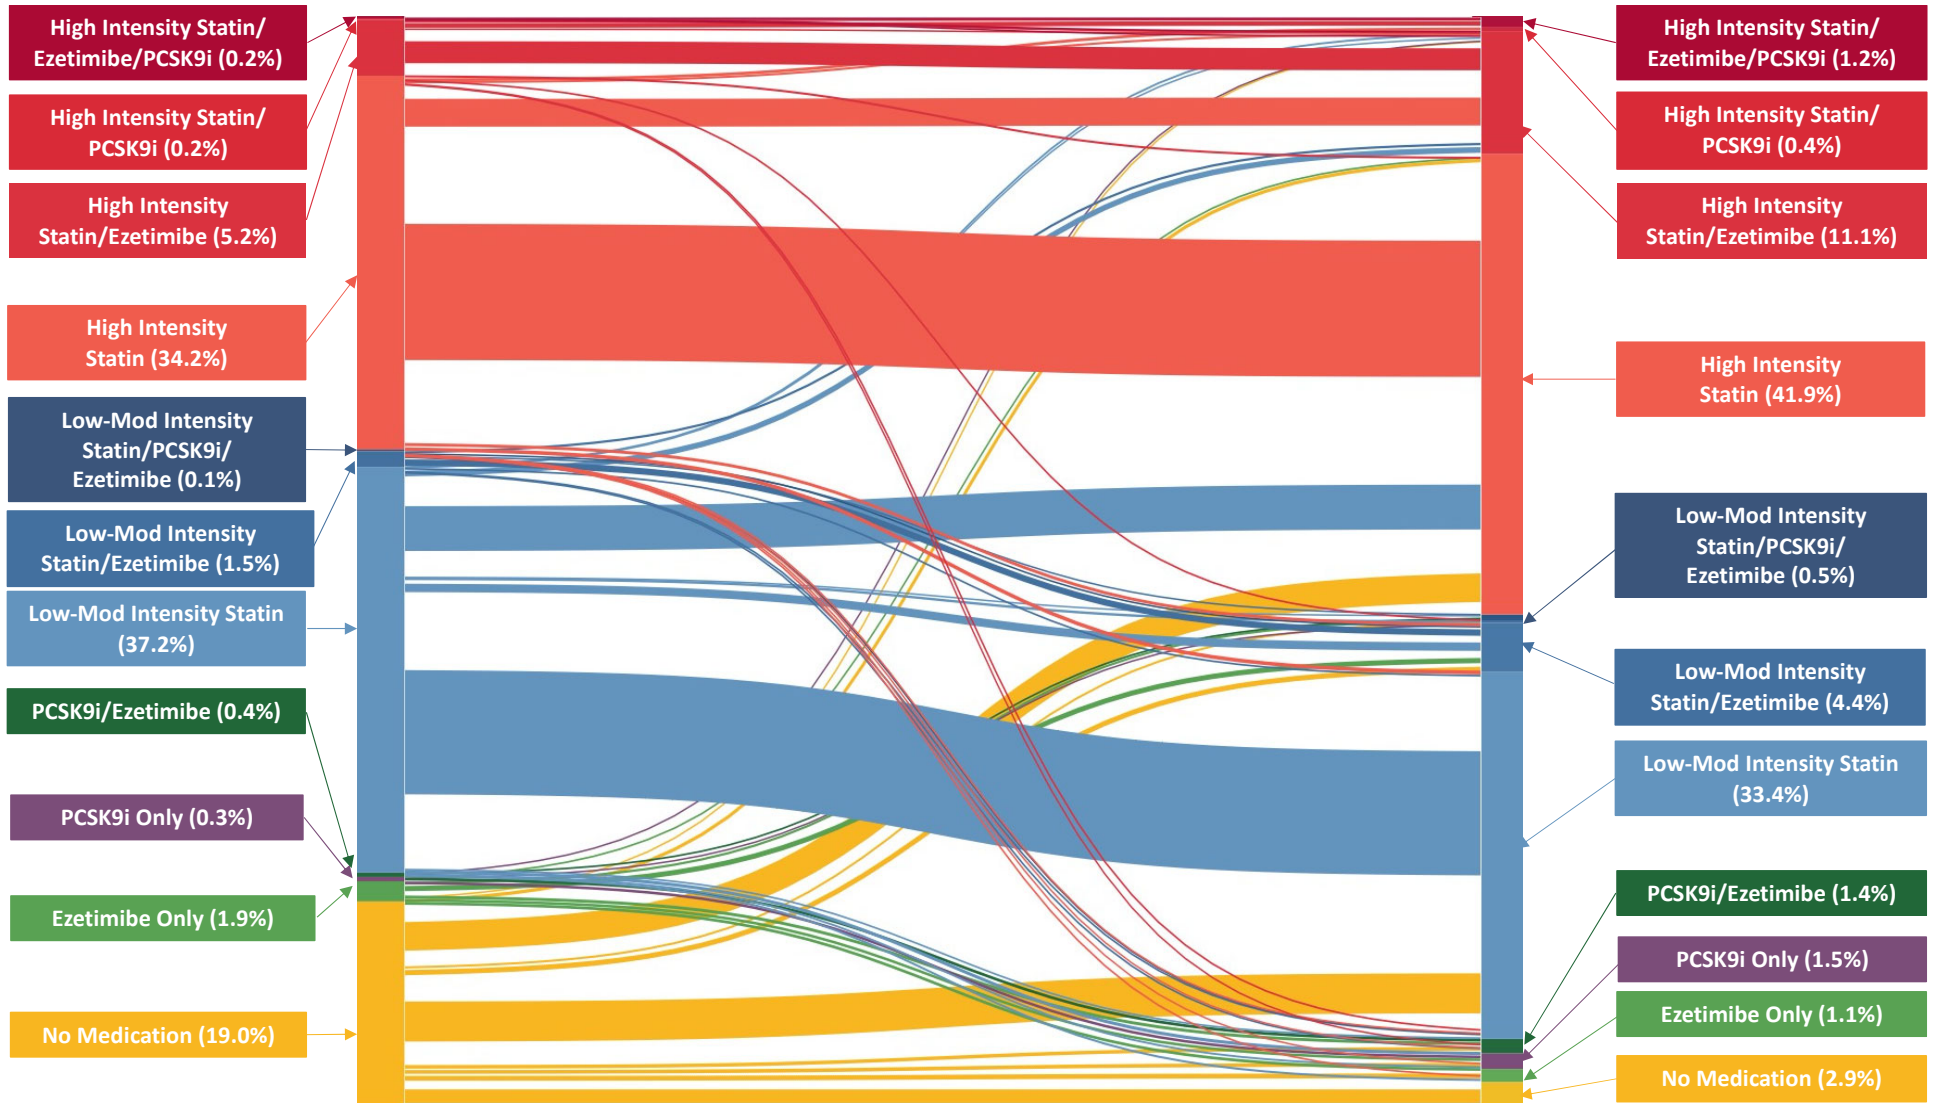

Supplement: jamacardiol-e224018-s001.pdf [file jamacardiol-e224018-s001.pdf]
